# Supplementary material for: Sarcopenic Obesity Tendency and Nutritional Status Is Related to the Risk of Sarcopenia, Frailty, Depression and Quality of Life in Patients with Dementia
Source: MDPI journal article supplement (doi:10.3390/ijerph19052492), 2022-02-22
Supplement: s1 [file s1]

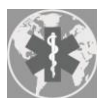

**Table S1.** The response of Mini Nutritional Assessment (MNA) questionnaire in patients with dementia.

|                                                                                                                                                         | Dementia<br>(n = 80) |                      |          |
|---------------------------------------------------------------------------------------------------------------------------------------------------------|----------------------|----------------------|----------|
| A1. Has moderate or severe food intake declined over the past 3 months due to loss of appetite, digestive problems, chewing or swallowing difficulties. | 6 (7.5%)             |                      |          |
| A2. Weight loss during the last 3 months.                                                                                                               | 6 (7.5%)             |                      |          |
| A3. Mobility for bed or chair bound, or able to get out of bed / chair but does not go out.                                                             | 2 (2.5%)             |                      |          |
| A4. Has suffered psychological stress or acute disease in the past 3 months.                                                                            | 0 (0.0%)             |                      |          |
| A5. Has suffered Neuropsychological problems.                                                                                                           | 70 (87.5%)           |                      |          |
| A6. Body mass index less than 19.                                                                                                                       | 3 (3.8%)             |                      |          |
| A7. Lives dependently.                                                                                                                                  | 2 (2.5%)             |                      |          |
| A8. Takes more than 3 prescription drugs per day.                                                                                                       | 65 (81.3%)           |                      |          |
| A9. Has suffered pressure sores or skin ulcers.                                                                                                         | 2 (2.5%)             |                      |          |
| A10. Lower than 3 full meals for the patient eat daily.                                                                                                 | 10 (12.5%)           |                      |          |
| A11.1. No selected consumption markers for protein intake: at least one serving of dairy products, such as milk, cheese, yoghurt per day.               | 61 (76.3%)           |                      |          |
| A11.2. No selected consumption two or more servings of legumes or eggs per week.                                                                        | 11 (13.8%)           |                      |          |
| A11.3. No selected consumption meat, fish, or poultry every day.                                                                                        | 17 (21.3%)           |                      |          |
| A12. No selected consumes two or more servings of fruit or vegetables per day.                                                                          | 34 (42.5%)           |                      |          |
| A13. Lower than 5 cups fluid (water, juice, coffee, tea, milk...) is consumed per day.                                                                  | 55 (68.8%)           |                      |          |
| A14. Unable to eat without assistance or self-fed with some difficulty.                                                                                 | 2 (2.5%)             |                      |          |
| A15. Views self as being malnourished.                                                                                                                  | 5 (6.3%)             |                      |          |
| A16. Not feel good for health status in comparison with other people of the same age.                                                                   | 11 (13.8%)           |                      |          |
| A17. Mid-arm circumference less than 22 cm.                                                                                                             | 1 (1.3%)             |                      |          |
| A18. Calf circumference less than 31 cm.                                                                                                                | 16 (20.0%)           |                      |          |
|                                                                                                                                                         | MNA ≥ 24<br>(n = 47) | MNA < 24<br>(n = 33) | p values |
| A1. Has moderate or severe food intake declined over the past 3 months due to loss of appetite, digestive problems, chewing or swallowing difficulties. | 1 (2.1%)             | 5 (15.2%)            | 0.08     |
| A2. Weight loss during the last 3 months.                                                                                                               | 3 (6.4%)             | 3 (9.1%)             | < 0.05   |
| A3. Mobility for bed or chair bound, or able to get out of bed / chair but does not go out.                                                             | 0 (0.0%)             | 2 (6.1%)             | 0.17     |
| A4. Has suffered psychological stress or acute disease in the past 3 months.                                                                            | 0 (0.0%)             | 0 (0.0%)             | -        |
| A5. Has suffered Neuropsychological problems.                                                                                                           | 37 (78.7%)           | 33 (100.0%)          | < 0.01   |
| A6. Body mass index less than 19.                                                                                                                       | 0 (0.0%)             | 3 (9.1%)             | 0.07     |
| A7. Lives dependently.                                                                                                                                  | 0 (0.0%)             | 2 (6.1%)             | 0.17     |
| A8. Takes more than 3 prescription drugs per day.                                                                                                       | 40 (85.1%)           | 25 (75.8%)           | 0.45     |
| A9. Has suffered pressure sores or skin ulcers.                                                                                                         | 2 (4.3%)             | 0 (0.0%)             | 0.51     |
| A10. Lower than 3 full meals for the patient eat daily.                                                                                                 | 4 (8.5%)             | 6 (18.2%)            | 0.30     |
| A11.1. No selected consumption markers for protein intake: at least one serving of dairy products, such as milk, cheese, yoghurt per day.               | 34 (72.3%)           | 27 (81.8%)           | 0.48     |
| A11.2. No selected consumption two or more servings of legumes or eggs per week.                                                                        | 4 (8.5%)             | 7 (21.2%)            | 0.19     |
| A11.3. No selected consumption meat, fish, or poultry every day.                                                                                        | 7 (14.9%)            | 10 (30.3%)           | 0.17     |
| A12. No selected consumes two or more servings of fruit or vegetables per day.                                                                          | 8 (17.0%)            | 26 (78.8%)           | < 0.01   |
| A13. Lower than 5 cups fluid (water, juice, coffee, tea, milk...) is consumed per day.                                                                  | 26 (55.3%)           | 29 (87.9%)           | < 0.01   |
| A14. Unable to eat without assistance or self-fed with some difficulty.                                                                                 | 2 (4.3%)             | 0 (0.0%)             | 0.51     |
| A15. Views self as being malnourished.                                                                                                                  | 0 (0.0%)             | 5 (15.2%)            | < 0.01   |
| A16. Not feel good for health status in comparison with other people of the same age.                                                                   | 4 (8.5%)             | 7 (21.2%)            | < 0.01   |
| A17. Mid-arm circumference less than 22 cm.                                                                                                             | 0 (0.0%)             | 1 (3.0%)             | 0.41     |
| A18. Calf circumference less than 31 cm.                                                                                                                | 4 (8.5%)             | 12 (36.4%)           | < 0.01   |
